# Supplementary material
Source: publisher figshare collection journal article supplement (https://sage.figshare.com/ndownloader/files/17961740)
Supplement: Supplementary file 1 [file 17961740]

**Table 2a. Risk of Bias for Cohort Studies as assessed by The Newcastle Ottawa scale.**

| Author, Year                      | Representativeness of exposed cohort (select bias) | Selection of non-exposed cohort (selection bias) | Ascertainment of exposure (selection bias) | Demonstration that outcome was not present at start of study (selection bias) | Comparability of cohorts (comparability bias) | Ascertainment of outcome (outcome bias) | Adequate follow-up (outcome bias) | Adequacy of follow-up of cohorts (outcome bias) | Total score |
|-----------------------------------|----------------------------------------------------|--------------------------------------------------|--------------------------------------------|-------------------------------------------------------------------------------|-----------------------------------------------|-----------------------------------------|-----------------------------------|-------------------------------------------------|-------------|
| Signal et al., 2017 <sup>29</sup> | *                                                  | *                                                | Standardized questionnaires                | *                                                                             | **                                            | Self-report                             | *                                 | *                                               | 7/9         |
| Buist et al., 2014 <sup>35</sup>  | *                                                  | *                                                | Standardized questionnaires                | *                                                                             | **                                            | Self-report                             | *                                 | > 70% attrition                                 | 6/9         |
| Gavin et al., 2011 <sup>32</sup>  | *                                                  | *                                                | Standardized questionnaires                | No                                                                            | **                                            | Self-report                             | *                                 | *                                               | 6/9         |
| Liu et al., 2018 <sup>47</sup>    | *                                                  | *                                                | Standardized questionnaires                | No                                                                            | **                                            | Self-report                             | *                                 | *                                               | 6/9         |
| Liu et al., 2016 <sup>44</sup>    | *                                                  | *                                                | Standardized questionnaires                | No                                                                            | **                                            | Self-report                             | *                                 | *                                               | 6/9         |

|                                       |   |                                            |                             |    |     |             |   |   |     |
|---------------------------------------|---|--------------------------------------------|-----------------------------|----|-----|-------------|---|---|-----|
| Abbott & Williams, 2006 <sup>36</sup> | * | Non-Pacific Islanders were not represented | Standardized questionnaires | No | * * | Self-report | * | * | 5/9 |
|---------------------------------------|---|--------------------------------------------|-----------------------------|----|-----|-------------|---|---|-----|

|                                      |   |   |                             |   |     |             |                                          |                 |     |
|--------------------------------------|---|---|-----------------------------|---|-----|-------------|------------------------------------------|-----------------|-----|
| Becares & Atatoa, 2016 <sup>37</sup> | * | * | Standardized questionnaires | * | * * | Self-report | Measured beyond the highest risk for PPD | > 30% attrition | 5/9 |
|--------------------------------------|---|---|-----------------------------|---|-----|-------------|------------------------------------------|-----------------|-----|

|                                     |                    |   |                             |    |     |             |             |   |     |
|-------------------------------------|--------------------|---|-----------------------------|----|-----|-------------|-------------|---|-----|
| D. Hayes et al., 2010 <sup>45</sup> | Not representative | * | Standardized questionnaires | No | * * | Self-report | Unspecified | * | 4/9 |
|-------------------------------------|--------------------|---|-----------------------------|----|-----|-------------|-------------|---|-----|

|                                     |                    |                    |                             |   |                                              |             |   |   |     |
|-------------------------------------|--------------------|--------------------|-----------------------------|---|----------------------------------------------|-------------|---|---|-----|
| Roberson et al., 2015 <sup>46</sup> | Not representative | Not representative | Standardized questionnaires | * | * (controlled for other factors but not age) | Self-report | * | * | 4/9 |
|-------------------------------------|--------------------|--------------------|-----------------------------|---|----------------------------------------------|-------------|---|---|-----|

|                                     |                                    |                                    |                             |    |                                              |             |                                       |   |     |
|-------------------------------------|------------------------------------|------------------------------------|-----------------------------|----|----------------------------------------------|-------------|---------------------------------------|---|-----|
| Stock et al., 2012 <sup>34</sup>    | Not representative                 | Not representative                 | Standardized questionnaires | *  | * (controlled for other factors but not age) | Self-report | *                                     | * | 4/9 |
| Wei et al., 2008 <sup>48</sup>      | Not representative                 | Not representative                 | Standardized questionnaires | No | * *                                          | Self-report | *                                     | * | 4/9 |
| Bowen et al., 2008 <sup>39,52</sup> | *                                  | Not mentioned                      | Standardized questionnaires | No | No                                           | Self-report | *                                     | * | 3/9 |
| B. Hayes et al., 2010 <sup>33</sup> | Not representative                 | Not representative                 | Standardized questionnaires | No | * *                                          | Self-report | Unspecified                           | * | 3/9 |
| Huang et al., 2007 <sup>42</sup>    | *                                  | *                                  | Standardized questionnaires | No | No                                           | Self-report | No                                    | * | 3/9 |
| Morland et al., 2007 <sup>53</sup>  | Not representative (clinic sample) | Not representative (clinic sample) | Standardized questionnaires | *  | * (controlled for other factors but not age) | Self-report | Beyond risk period for Antenatal PTSD | * | 3/9 |

|                                     |                                                              |                    |                             |    |                                              |             |    |   |     |
|-------------------------------------|--------------------------------------------------------------|--------------------|-----------------------------|----|----------------------------------------------|-------------|----|---|-----|
| Shah et al., 2011 <sup>40</sup>     | *                                                            | Not representative | Standardized questionnaires | No | No                                           | Self-report | *  | * | 3/9 |
| Wang et al., 2003 <sup>49</sup>     | No                                                           | No                 | Standardized questionnaires | No | * (controlled for other factors but not age) | Self-report | *  | * | 3/9 |
| Goebert et al., 2007 <sup>30</sup>  | Not representative                                           | Not representative | Standardized questionnaires | No | No                                           | Self-report | *  | * | 2/9 |
| Sugarman et al., 1994 <sup>43</sup> | Not representative of all urban American Indian women        | *                  | Standardized questionnaires | No | No                                           | Self-report | No | * | 2/9 |
| Webster et al., 1994 <sup>38</sup>  | Not representative (deliberately excluded Pacific Islanders) | *                  | Standardized questionnaires | No | No                                           | Self-report | No | * | 2/9 |

|                                  |                                    |                                    |                             |    |    |             |                                       |                              |     |
|----------------------------------|------------------------------------|------------------------------------|-----------------------------|----|----|-------------|---------------------------------------|------------------------------|-----|
| Mah et al., 2017 <sup>54</sup>   | *                                  | No comparison group                | Standardized questionnaires | No | No | Self-report | Beyond risk period for Antenatal PTSD | Significant attrition (>80%) | 1/9 |
| Onoye et al., 2009 <sup>31</sup> | Not representative (clinic sample) | Not representative (clinic sample) | Standardized questionnaires | No | No | Self-report | *                                     | Significant attrition (>50%) | 1/9 |

---

There are 8 criteria of the NOS which are represented in each column. A maximum of one star can be allocated to each criterion, with the exception of comparability bias, where two stars can be allocated. The greater the number of stars, the higher the quality of the study

**Table 2b. Risk of bias for Case-Control studies as assessed by The Newcastle Ottawa scale.**

| Author,<br>Year                       | Adequate<br>definition<br>(selection<br>bias) | Representativeness<br>(selection bias) | Selection of<br>controls<br>(selection<br>bias) | Definition of<br>controls<br>(selection<br>bias) | Comparability of<br>cases and controls<br>(comparability<br>bias) | Ascertainment of<br>exposure<br>(exposure bias) | Non-<br>response rate<br>(exposure<br>bias) | Total<br>score |
|---------------------------------------|-----------------------------------------------|----------------------------------------|-------------------------------------------------|--------------------------------------------------|-------------------------------------------------------------------|-------------------------------------------------|---------------------------------------------|----------------|
| Burns et al.,<br>2006 <sup>50</sup>   | *                                             | *                                      | Hospital<br>controls                            | *                                                | **                                                                | *                                               | *                                           | 7/8            |
| Burns et al.,<br>2006 <sup>51</sup>   | *                                             | *                                      | Hospital<br>controls                            | *                                                | **                                                                | *                                               | *                                           | 7/8            |
| Dodgson et<br>al., 2014 <sup>41</sup> | Self-report                                   | *                                      | Hospital<br>controls                            | *                                                | * *                                                               | Self-report                                     | *                                           | 5/8            |

There are 8 criteria of the NOS which are represented in each column. A maximum of one star can be allocated to all categories, with the exception of comparability bias, where two stars can be allocated. The greater the number of stars, the higher the quality of the study
